# Supplementary material for: SDCBP Modulates Stemness and Chemoresistance in Head and Neck Squamous Cell Carcinoma through Src Activation
Source: MDPI journal article supplement (doi:10.3390/cancers13194952), 2021-10-01

A

Mitosis (H&E)

JHU029 siCtrl

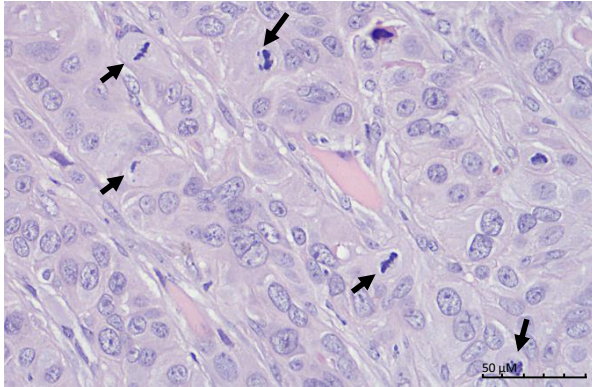

JHU029 siSDCBP

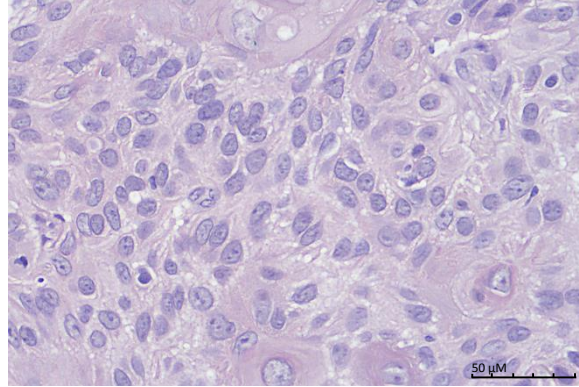

JHU029-R siCtrl

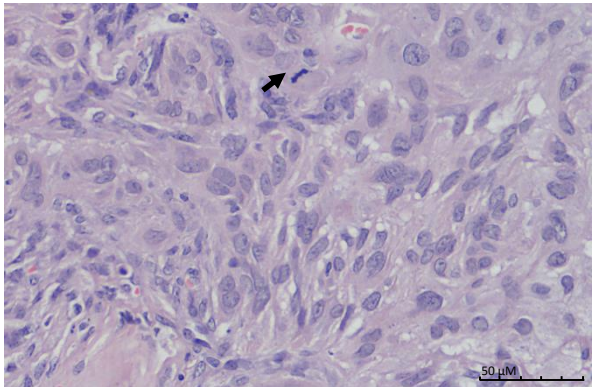

JHU029-R siSDCBP

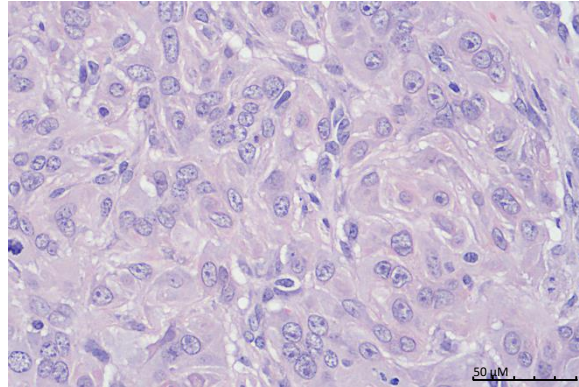

B

Ki-67 (IHC)

JHU029 siCtrl

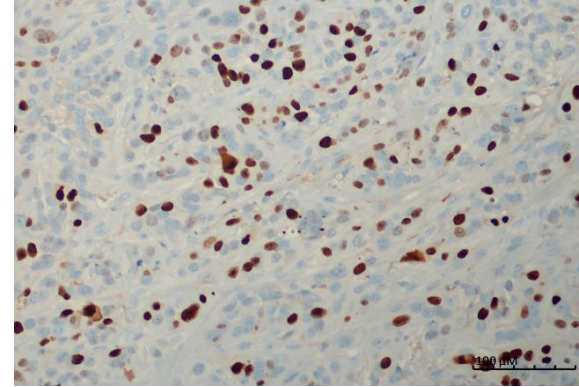

JHU029 siSDCBP

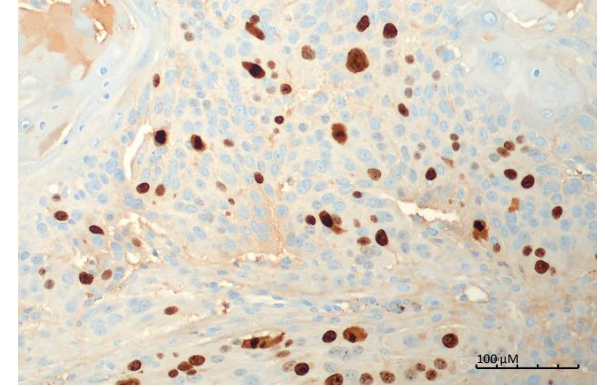

JHU029-R siCtrl

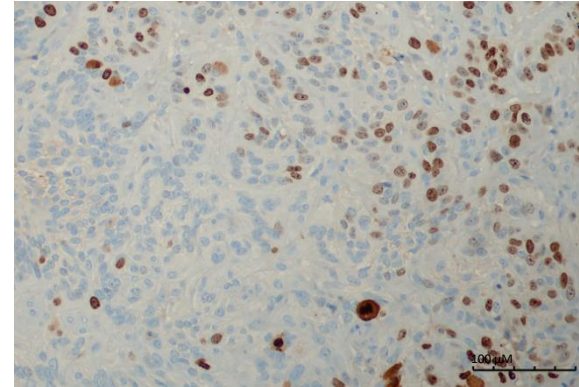

JHU029-R siSDCBP

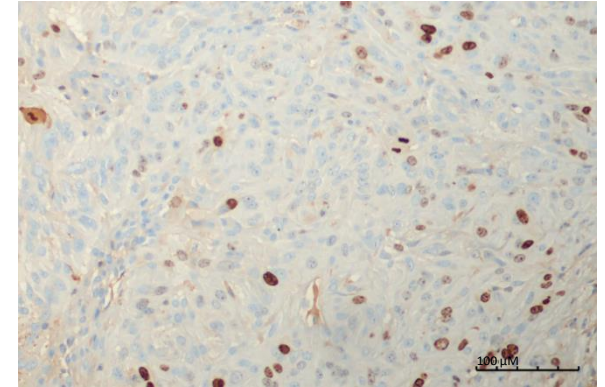

Supplement: s1 [file s1]
