# Supplementary material for: SDCBP Modulates Stemness and Chemoresistance in Head and Neck Squamous Cell Carcinoma through Src Activation
Source: MDPI journal article supplement (doi:10.3390/cancers13194952), 2021-10-01
Supplement: s1 [file s1]

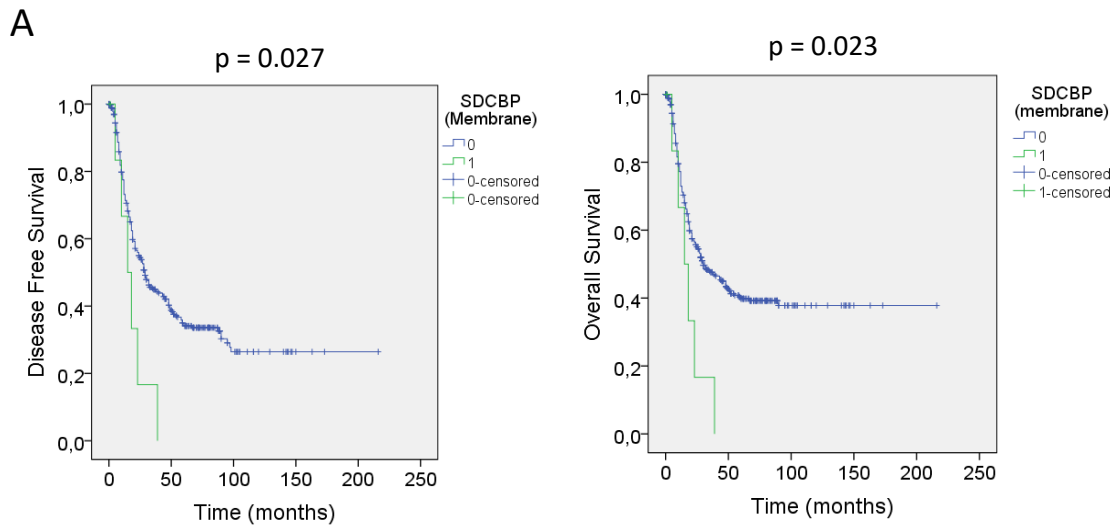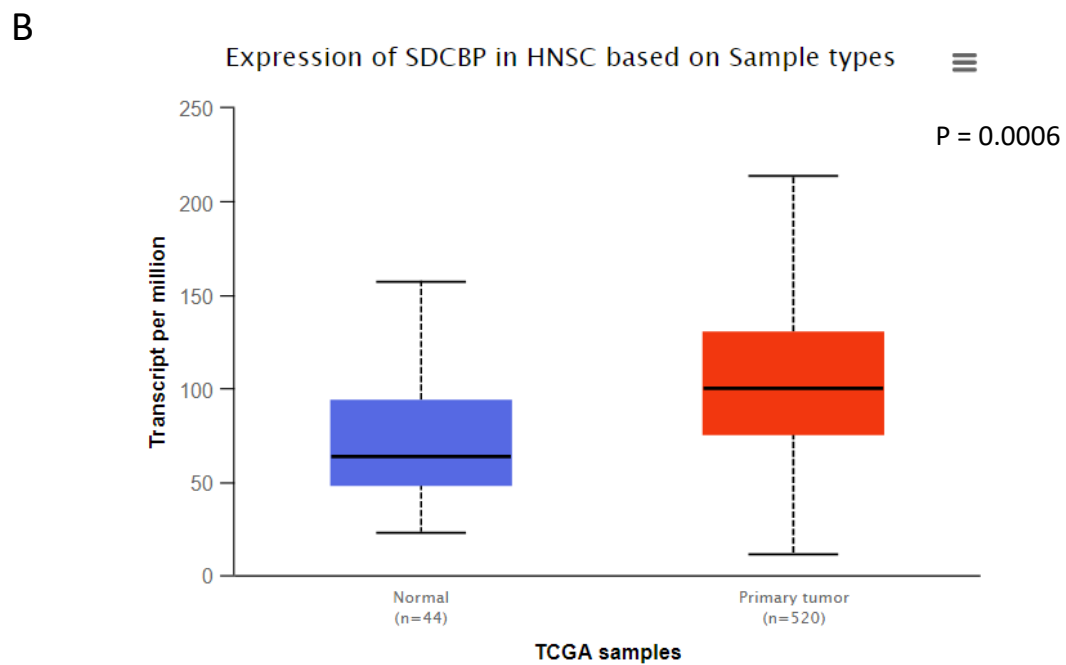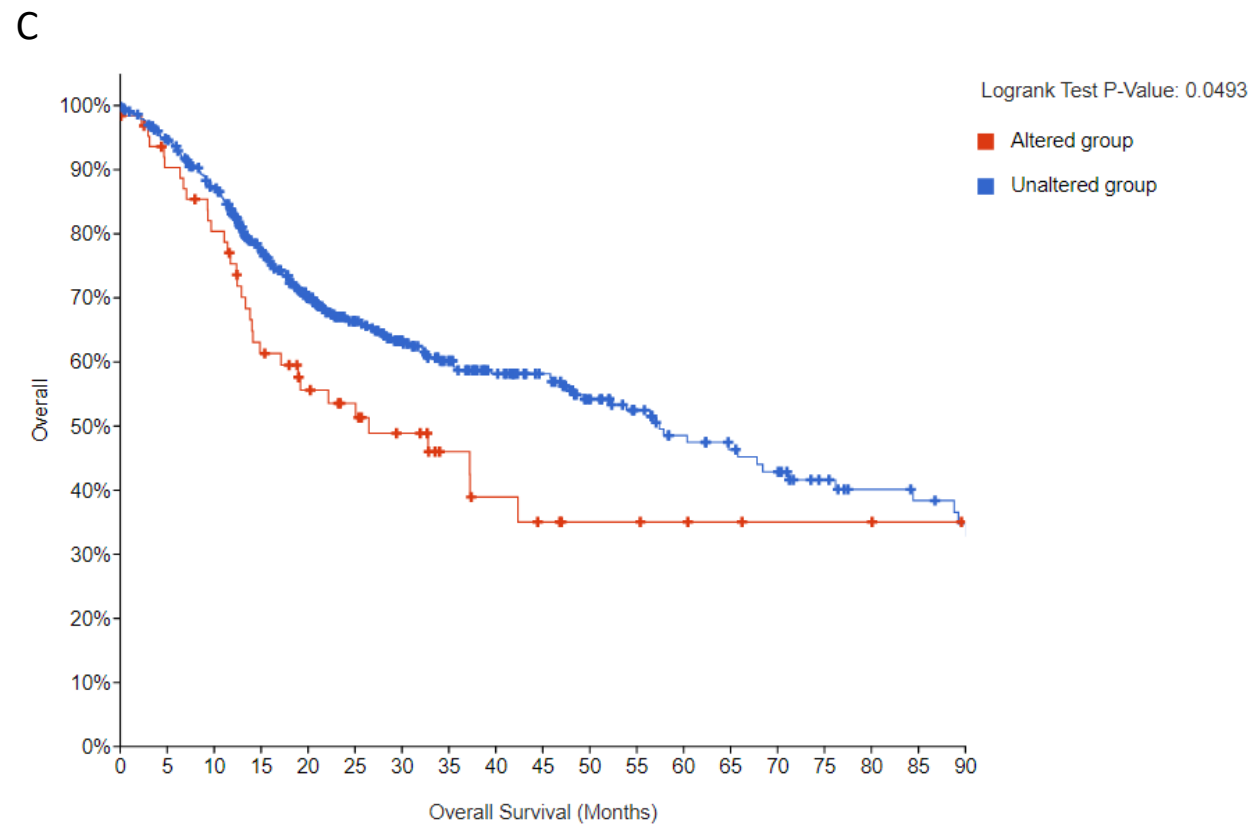

|                 | Number of Cases, Total | Number of Cases, Deceased | Median Months Overall |
|-----------------|------------------------|---------------------------|-----------------------|
| Altered group   | 63                     | 33                        | 26.48                 |
| Unaltered group | 431                    | 179                       | 57.42                 |
