# Supplementary figures and images for: SDCBP Modulates Stemness and Chemoresistance in Head and Neck Squamous Cell Carcinoma through Src Activation
Source: MDPI journal article supplement (doi:10.3390/cancers13194952), 2021-10-01

A

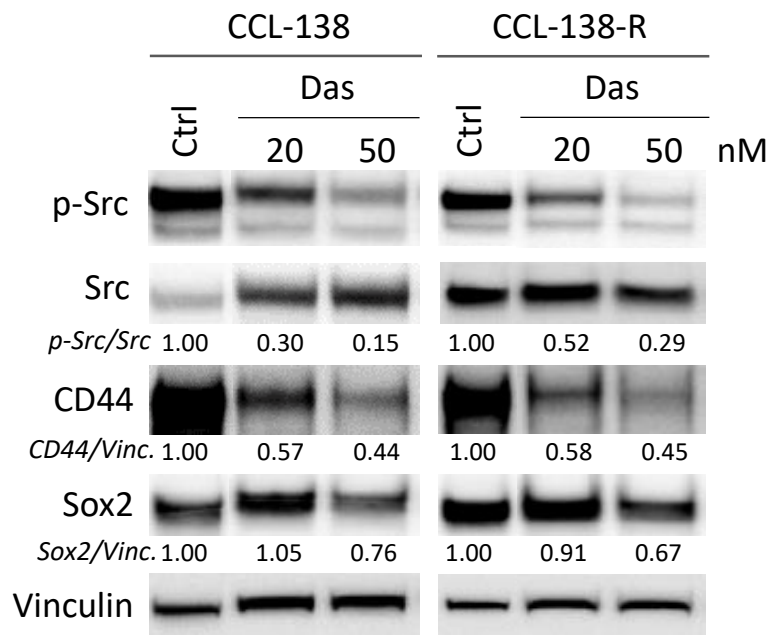

B

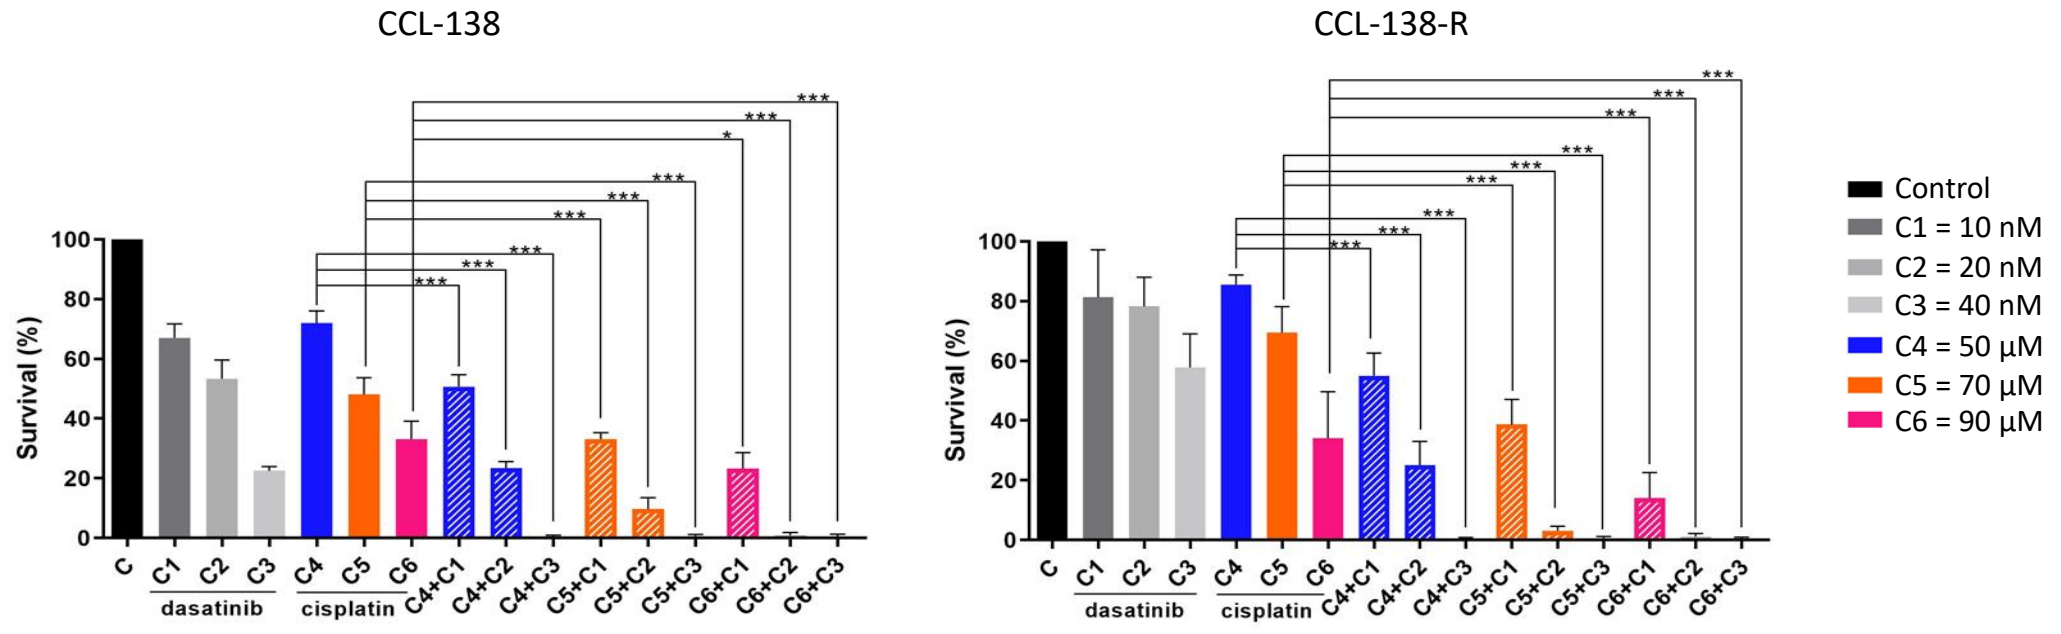

Figure S9

Supplement: s1 [file s1]

A

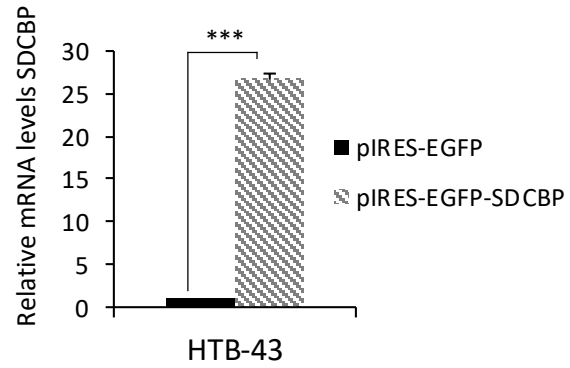

B

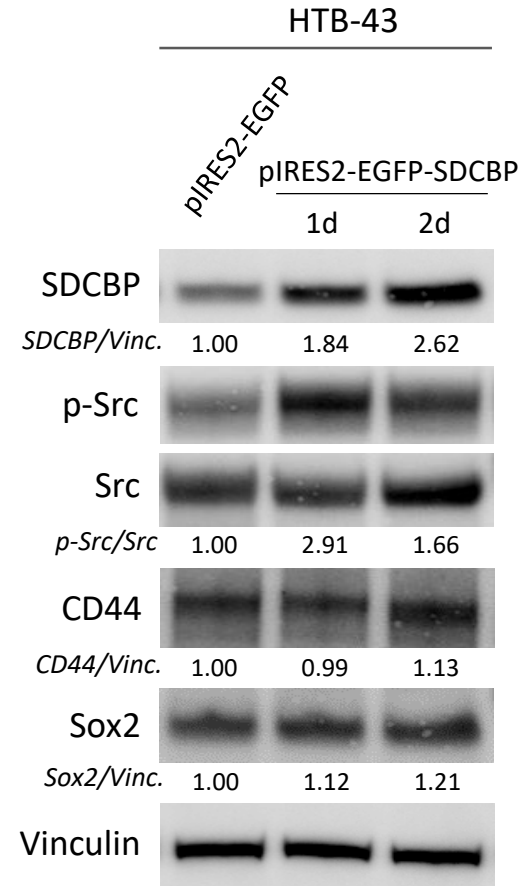

C

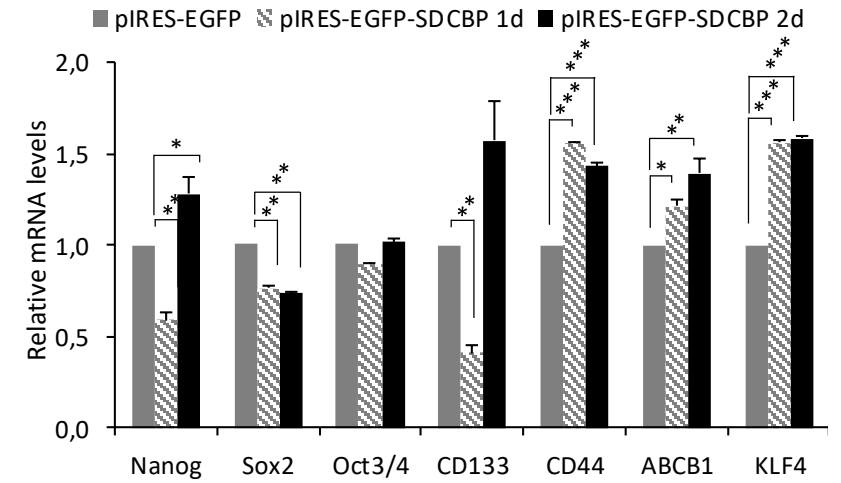

Supplement: s1 [file s1]

A

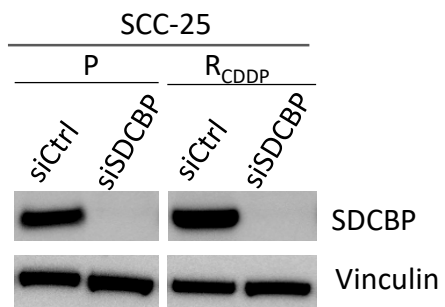

B

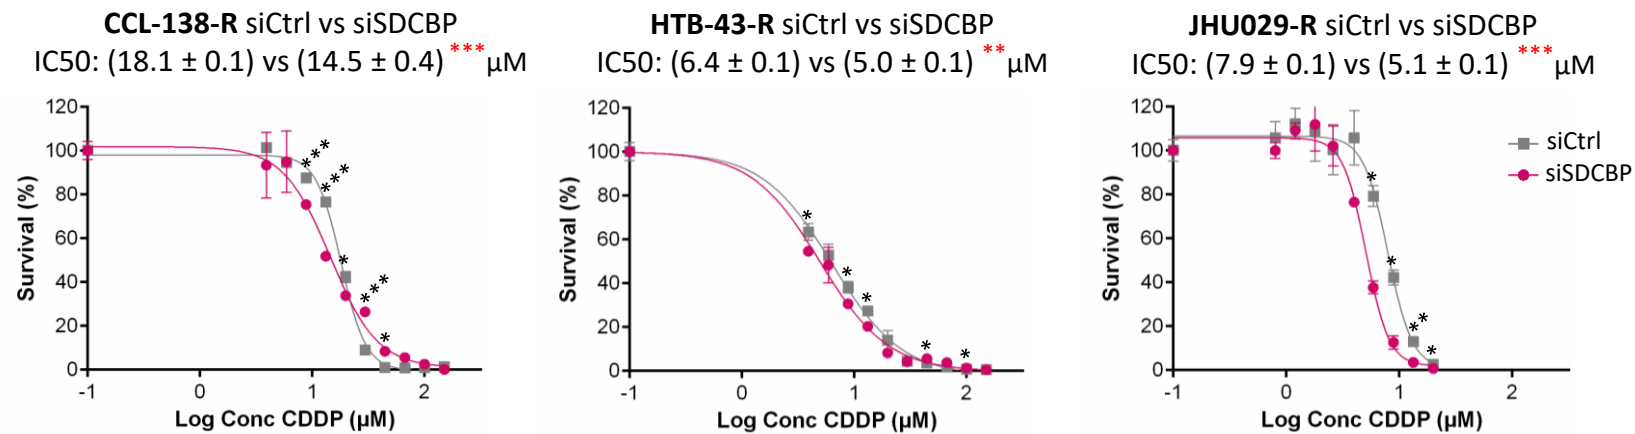

C

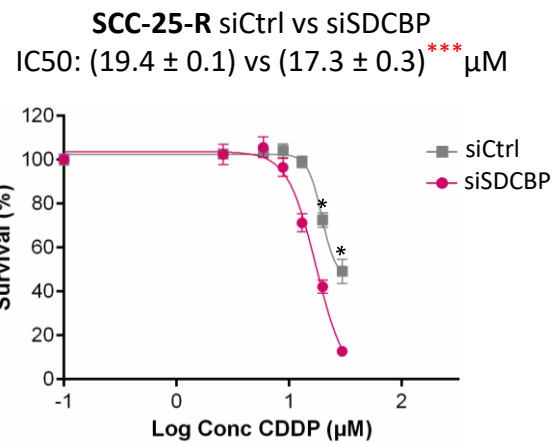

D

| Cell line | IC50 (μM)  |            | % Reduction |
|-----------|------------|------------|-------------|
|           | siCtrl     | siSDCBP    |             |
| SCC-25-R  | 19.4 ± 0.1 | 17.3 ± 0.3 | 10.8        |

E

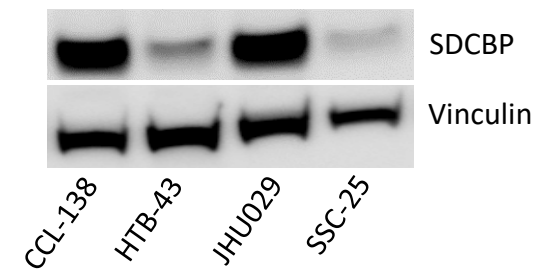

Supplement: s1 [file s1]

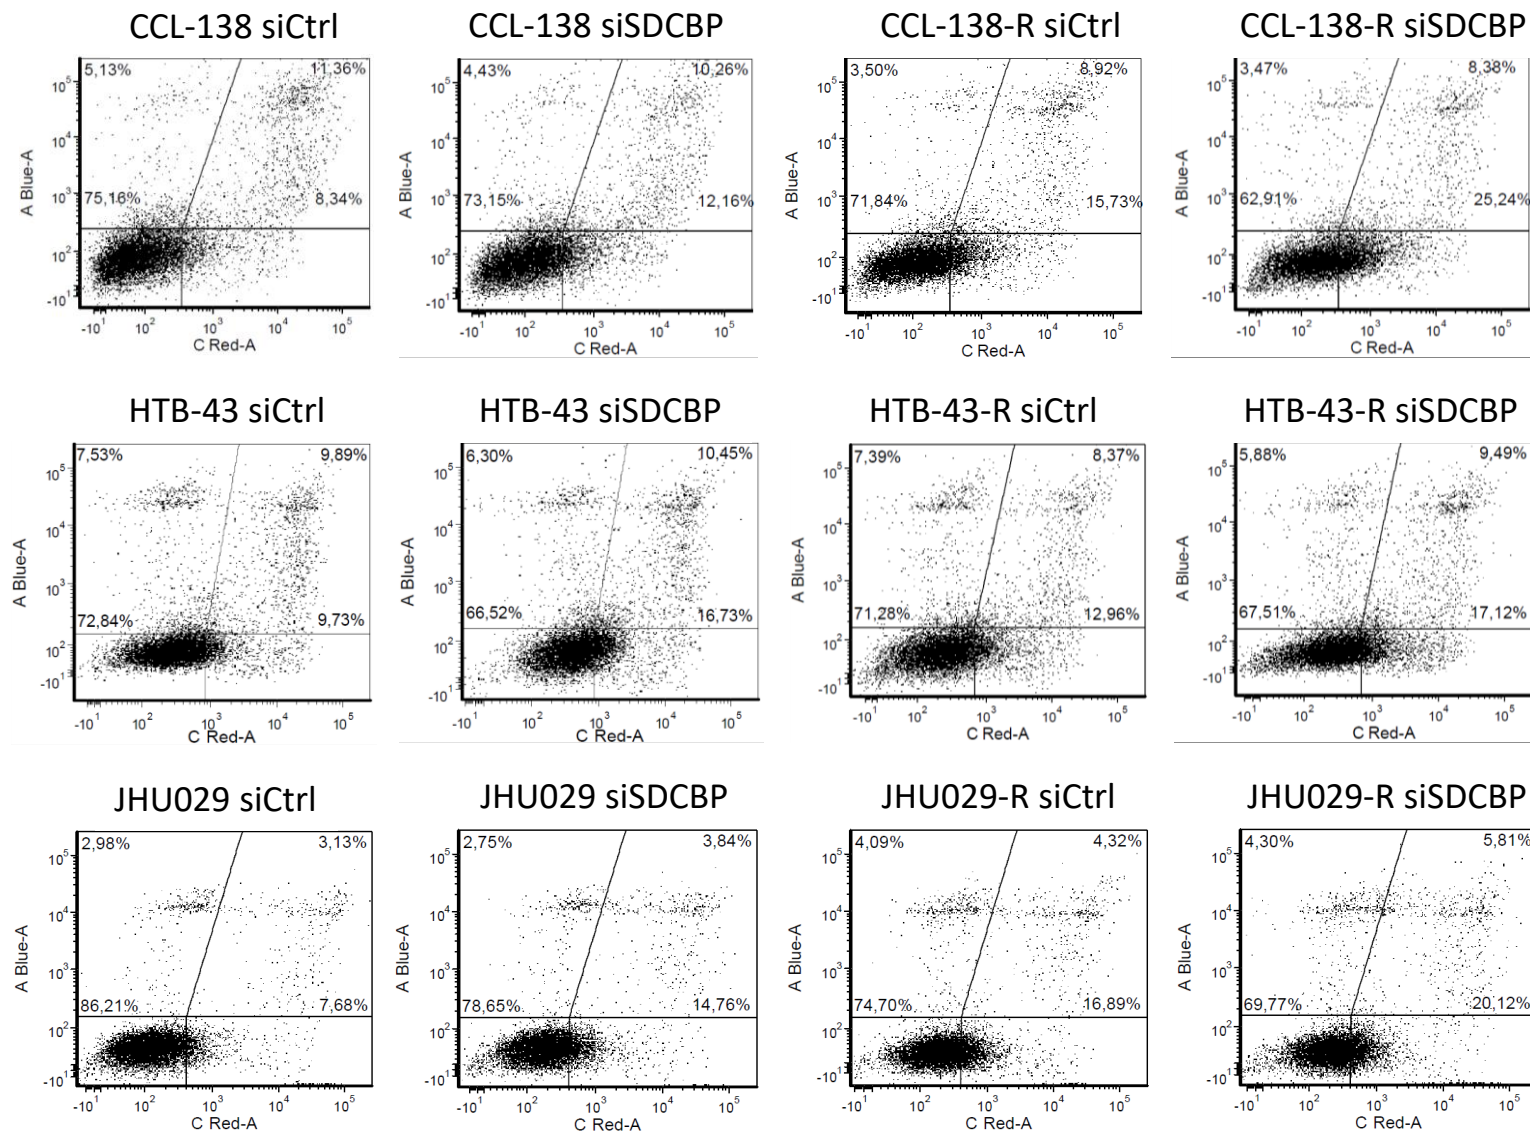

Figure S8

Supplement: s1 [file s1]

ABCB1

A

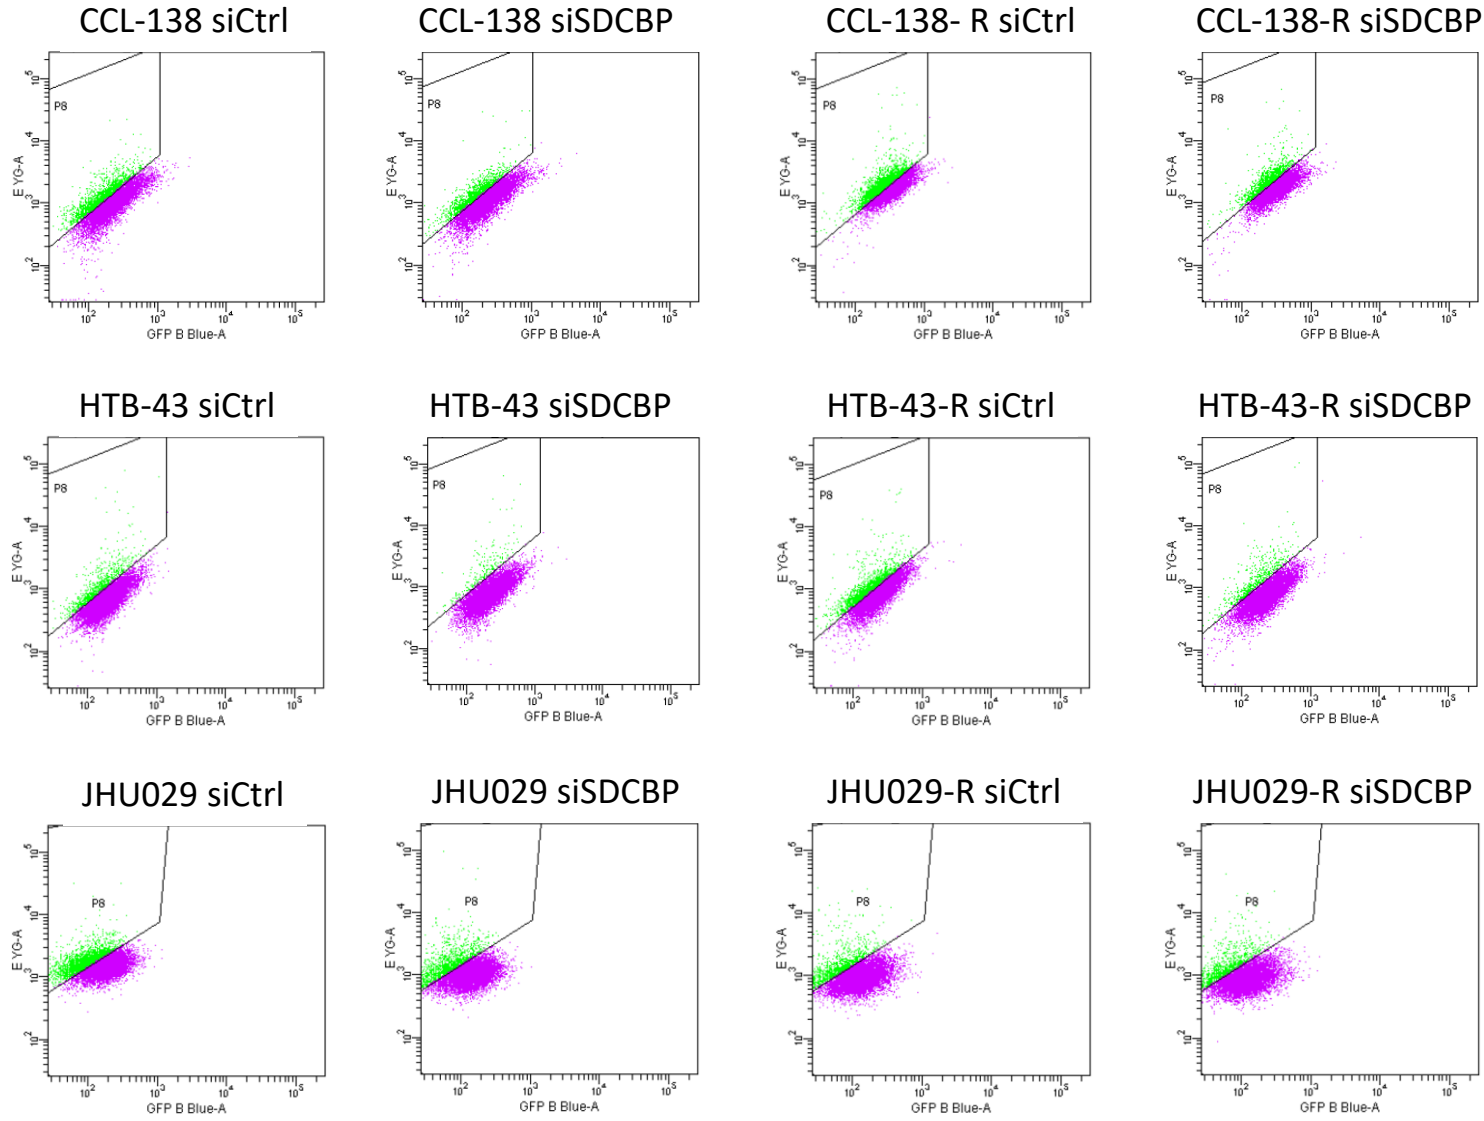

B

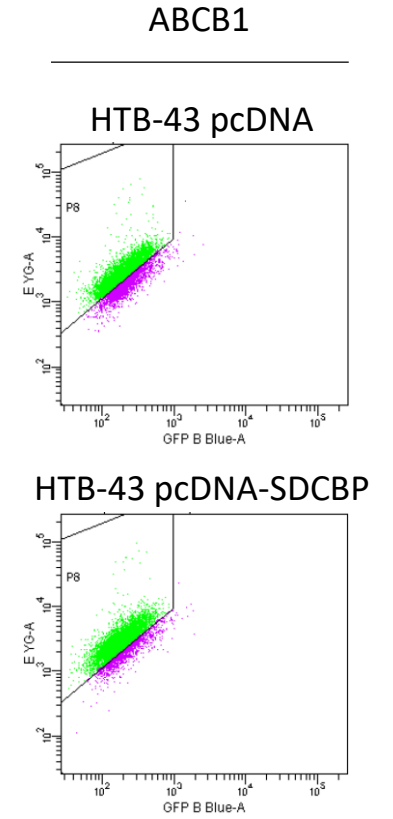

Figure S7

Supplement: s1 [file s1]

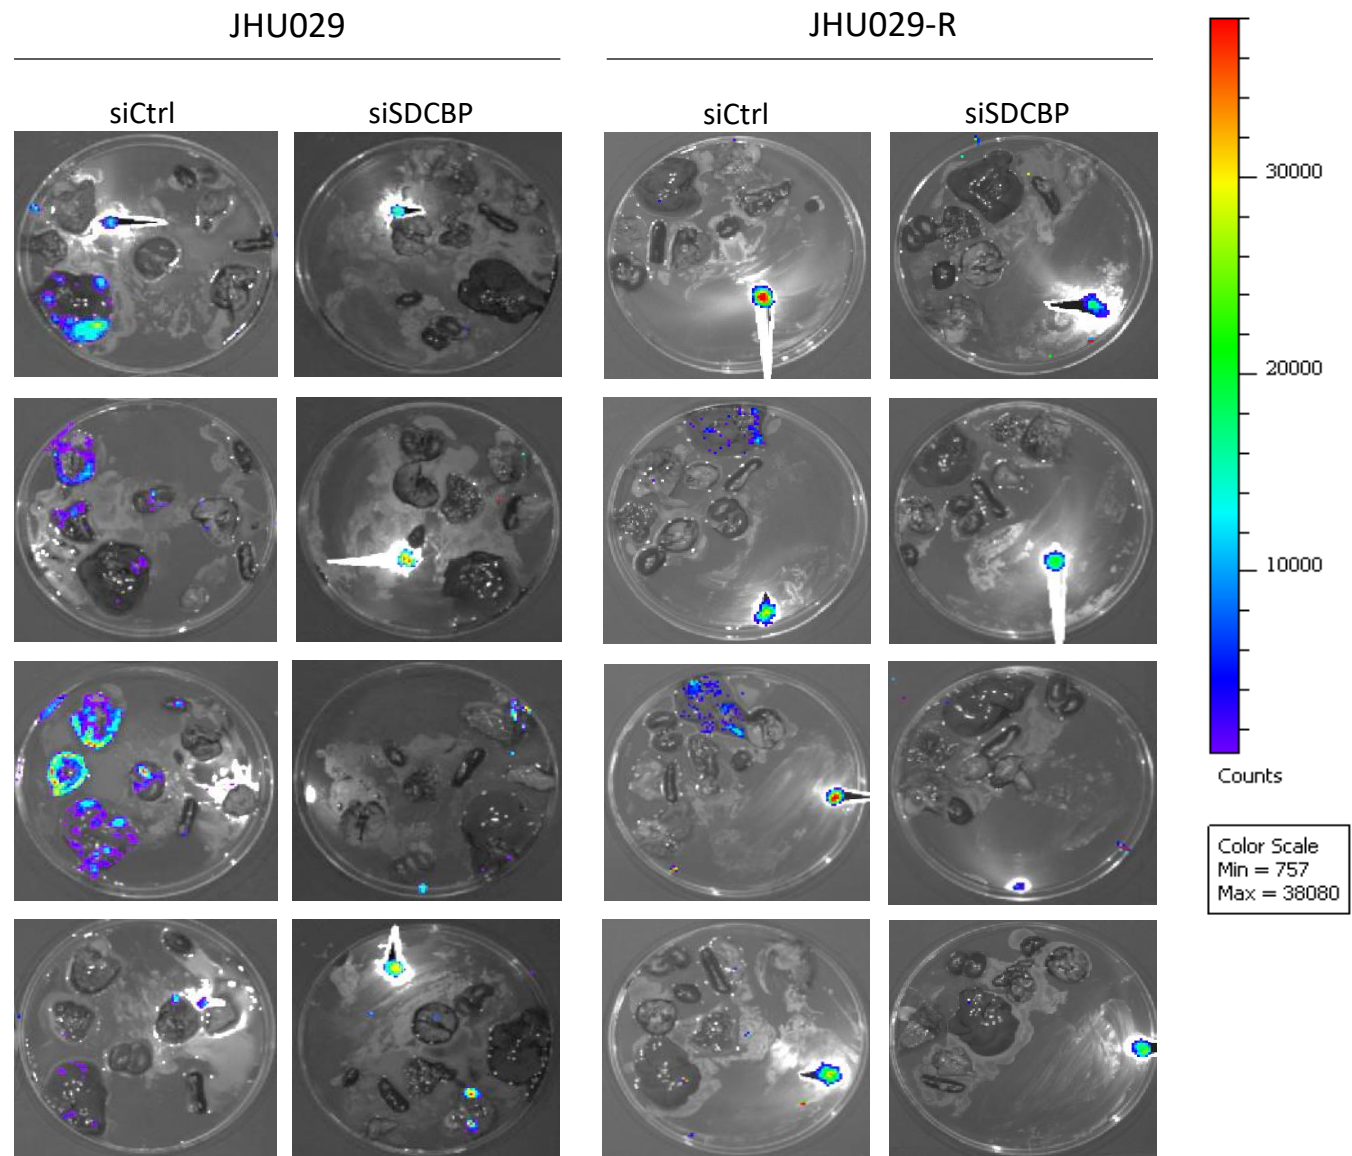

Figure S12

Supplement: s1 [file s1]

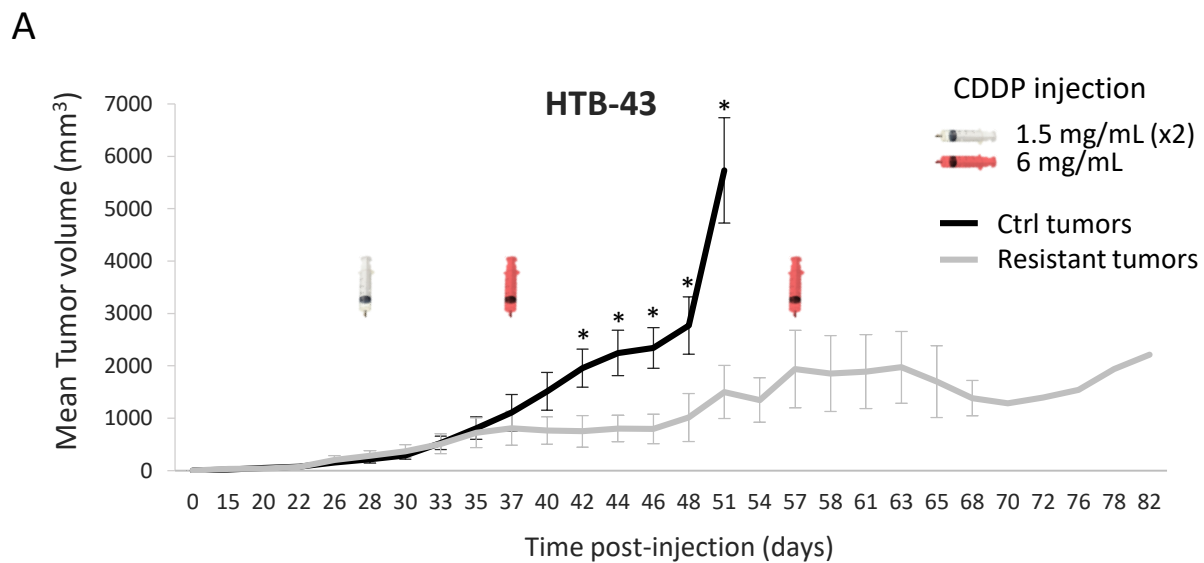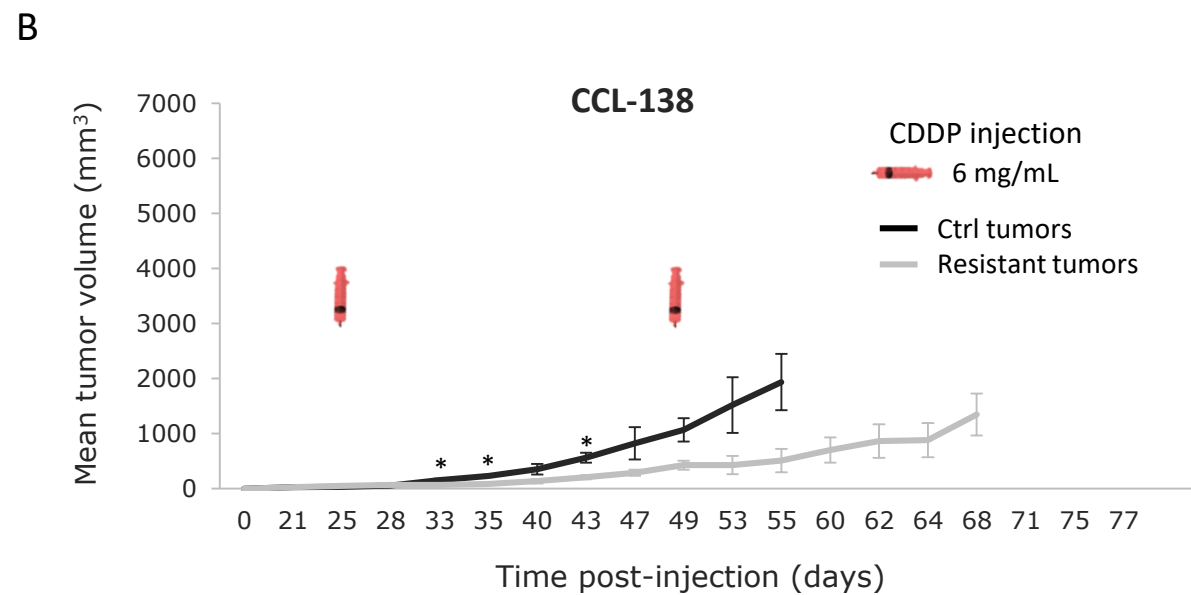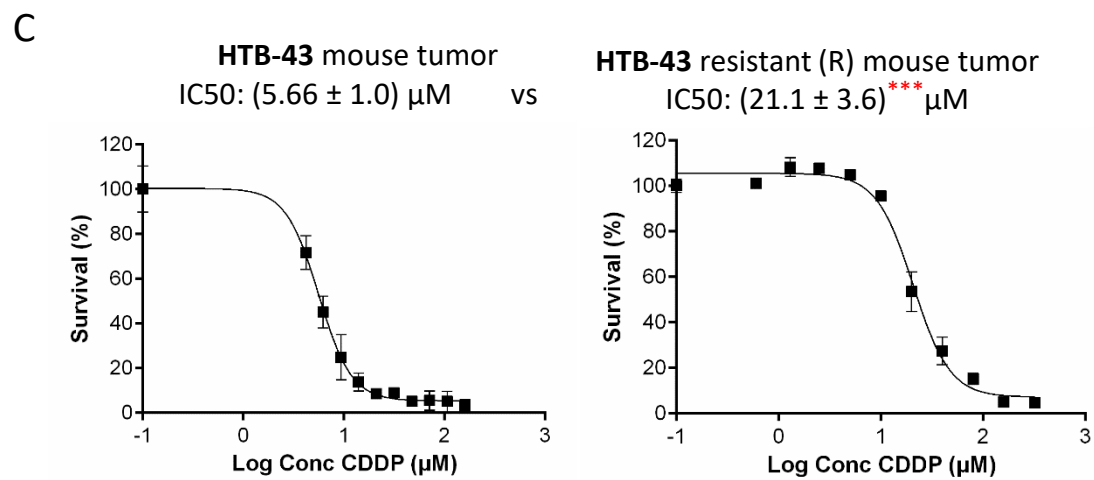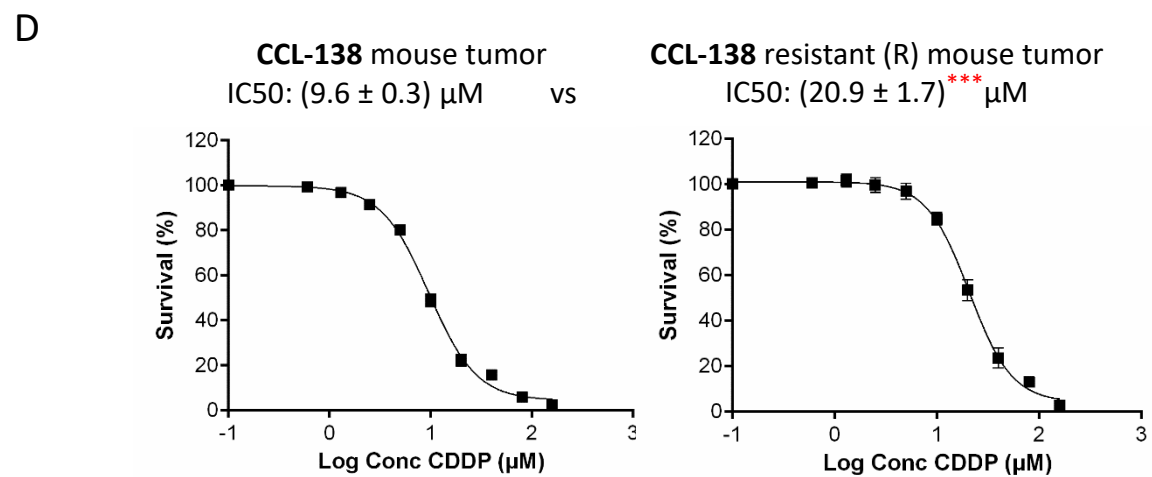

Supplement: s1 [file s1]

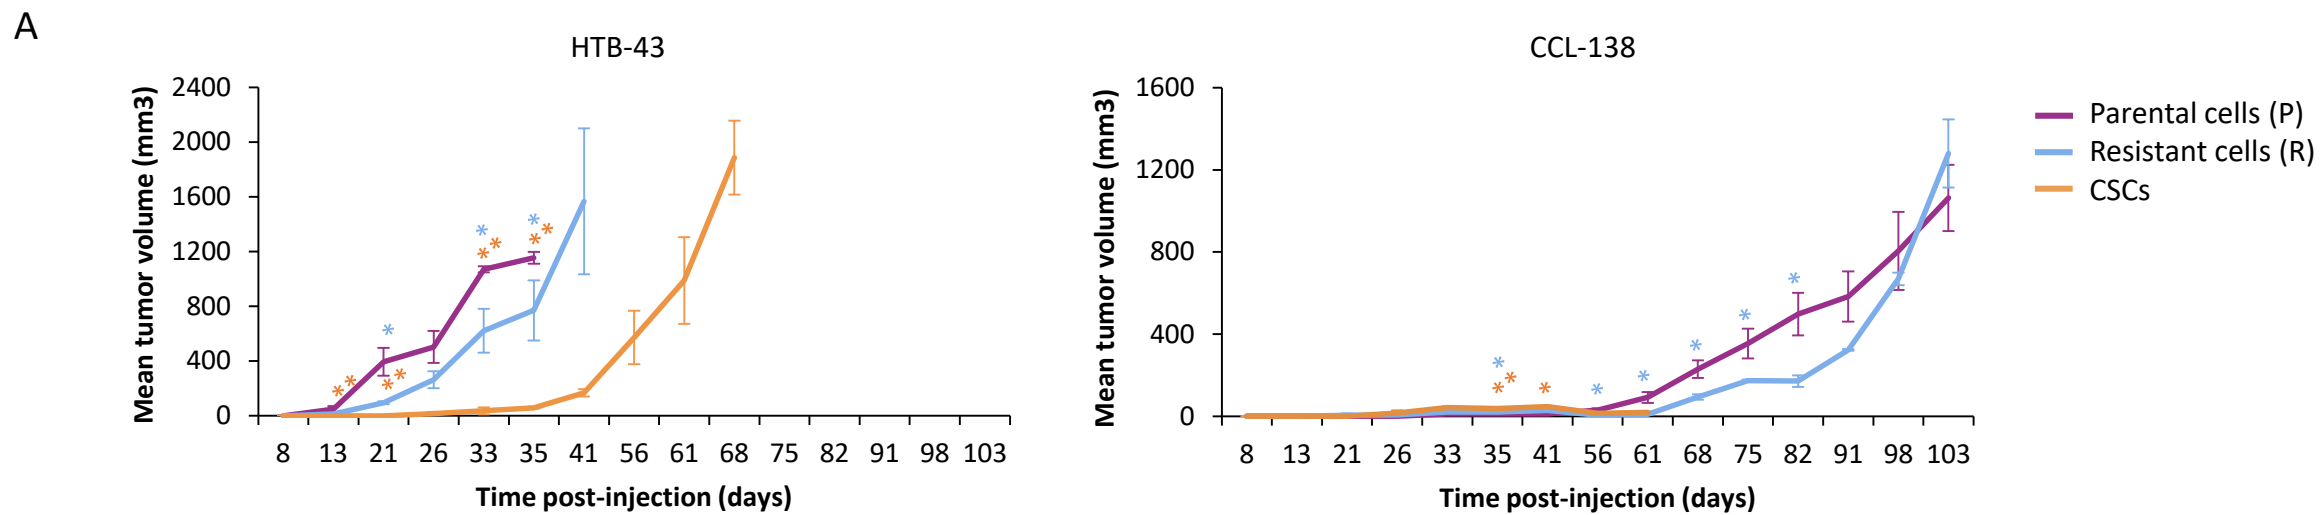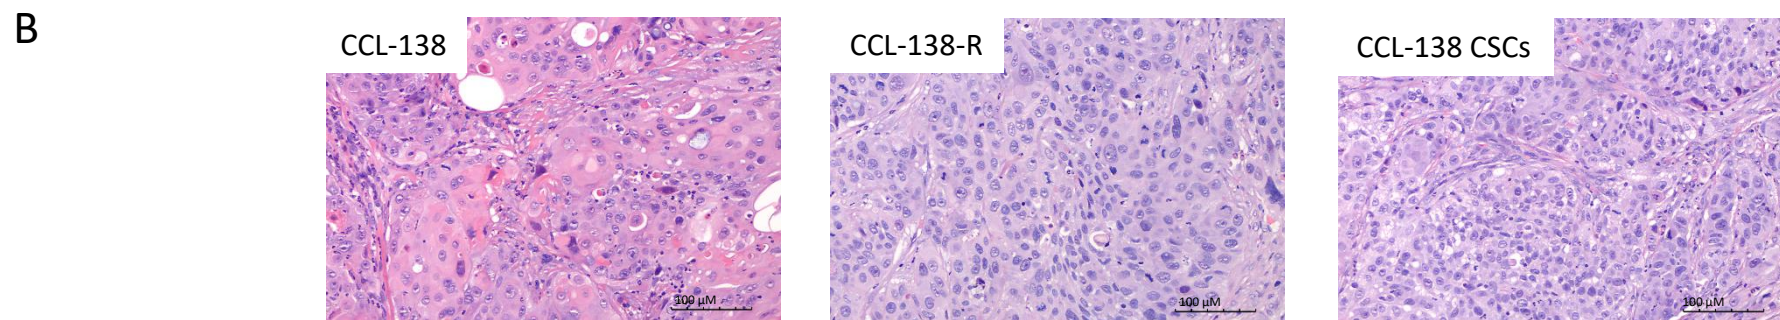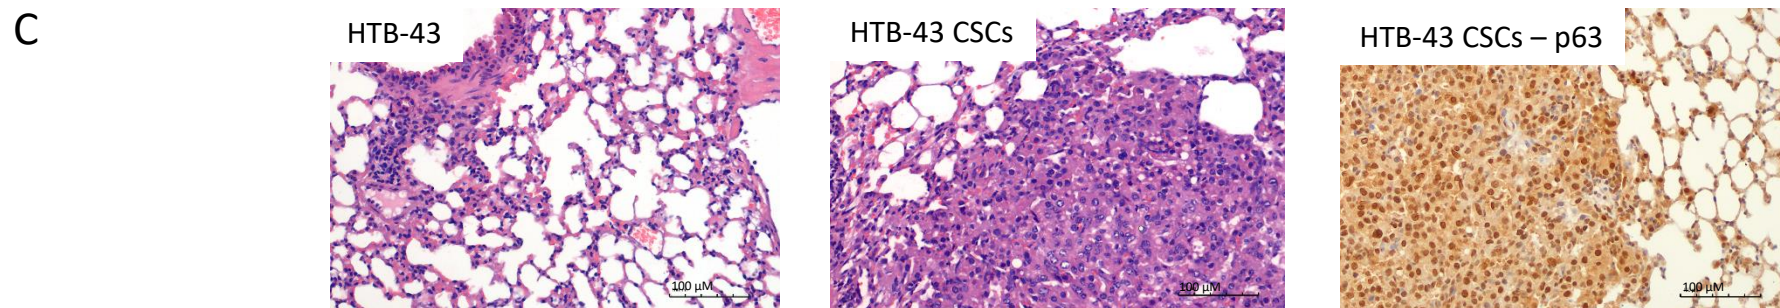

Figure S3

Supplement: s1 [file s1]

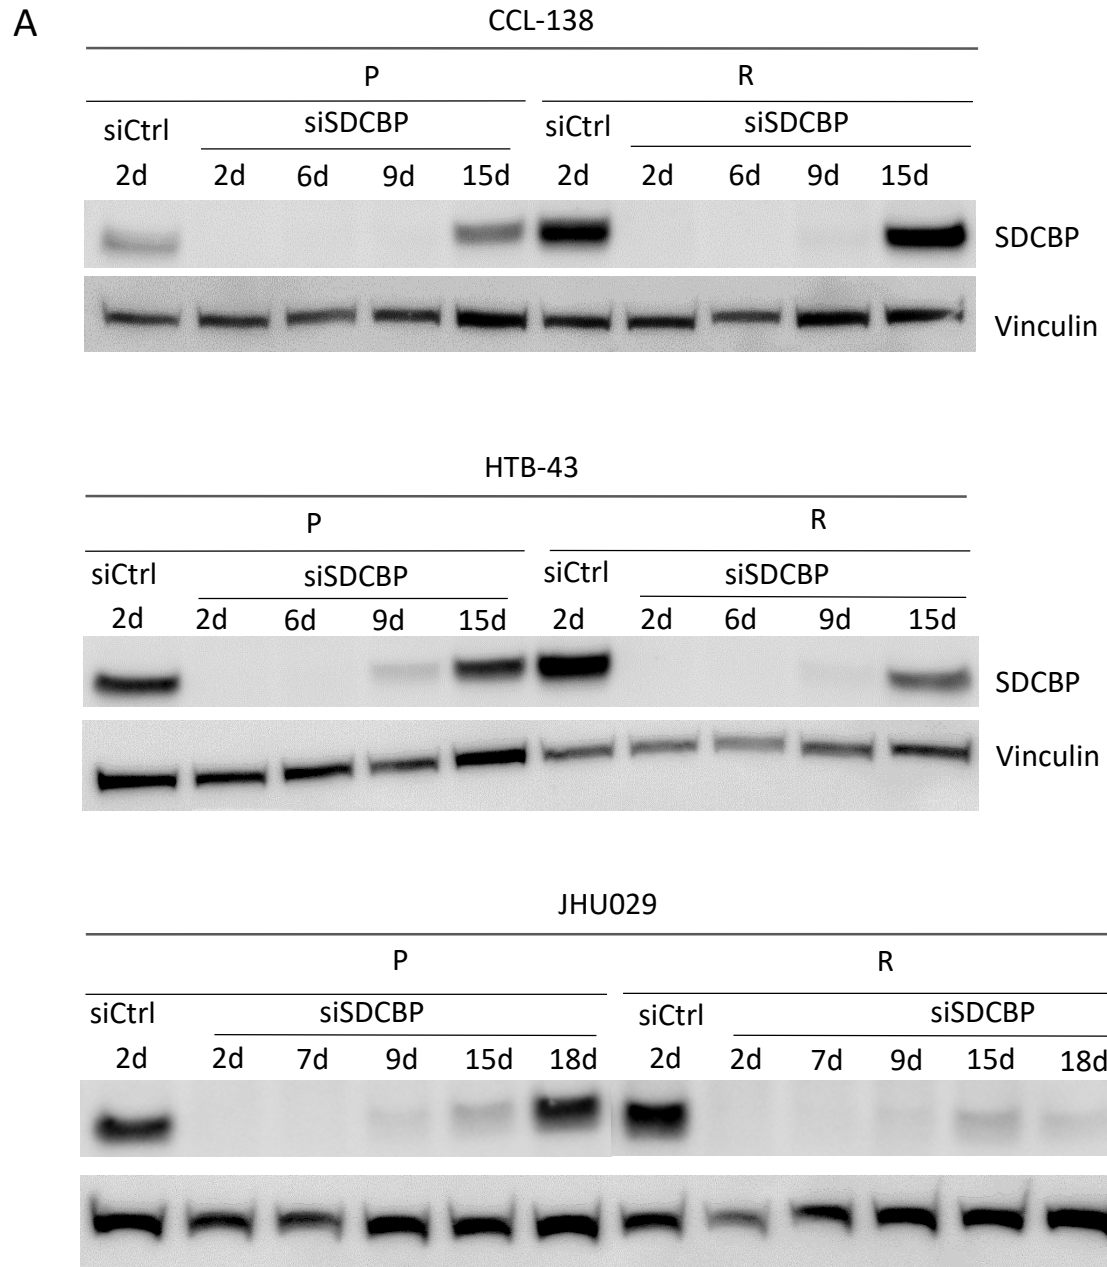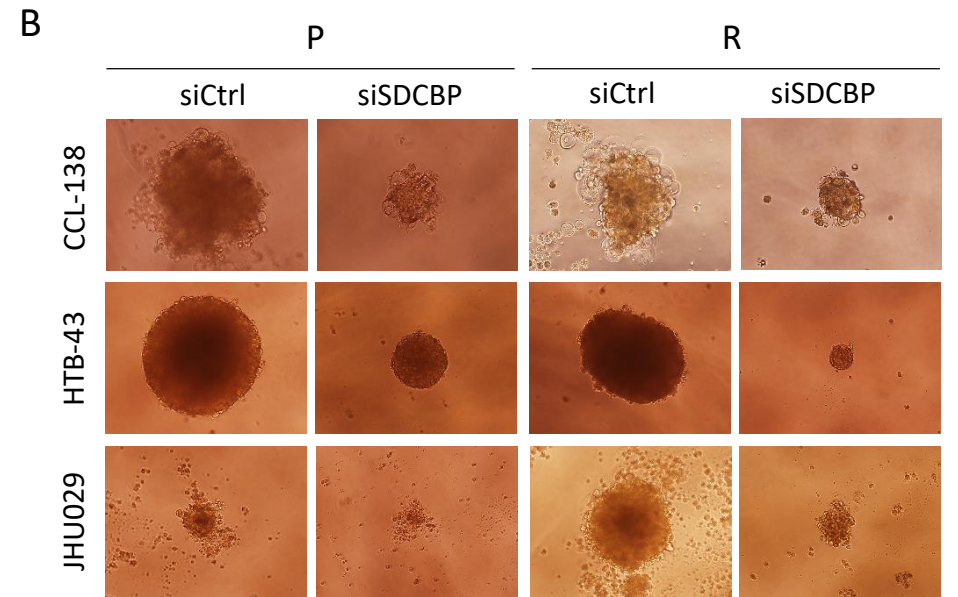

Figure S6

Supplement: s1 [file s1]

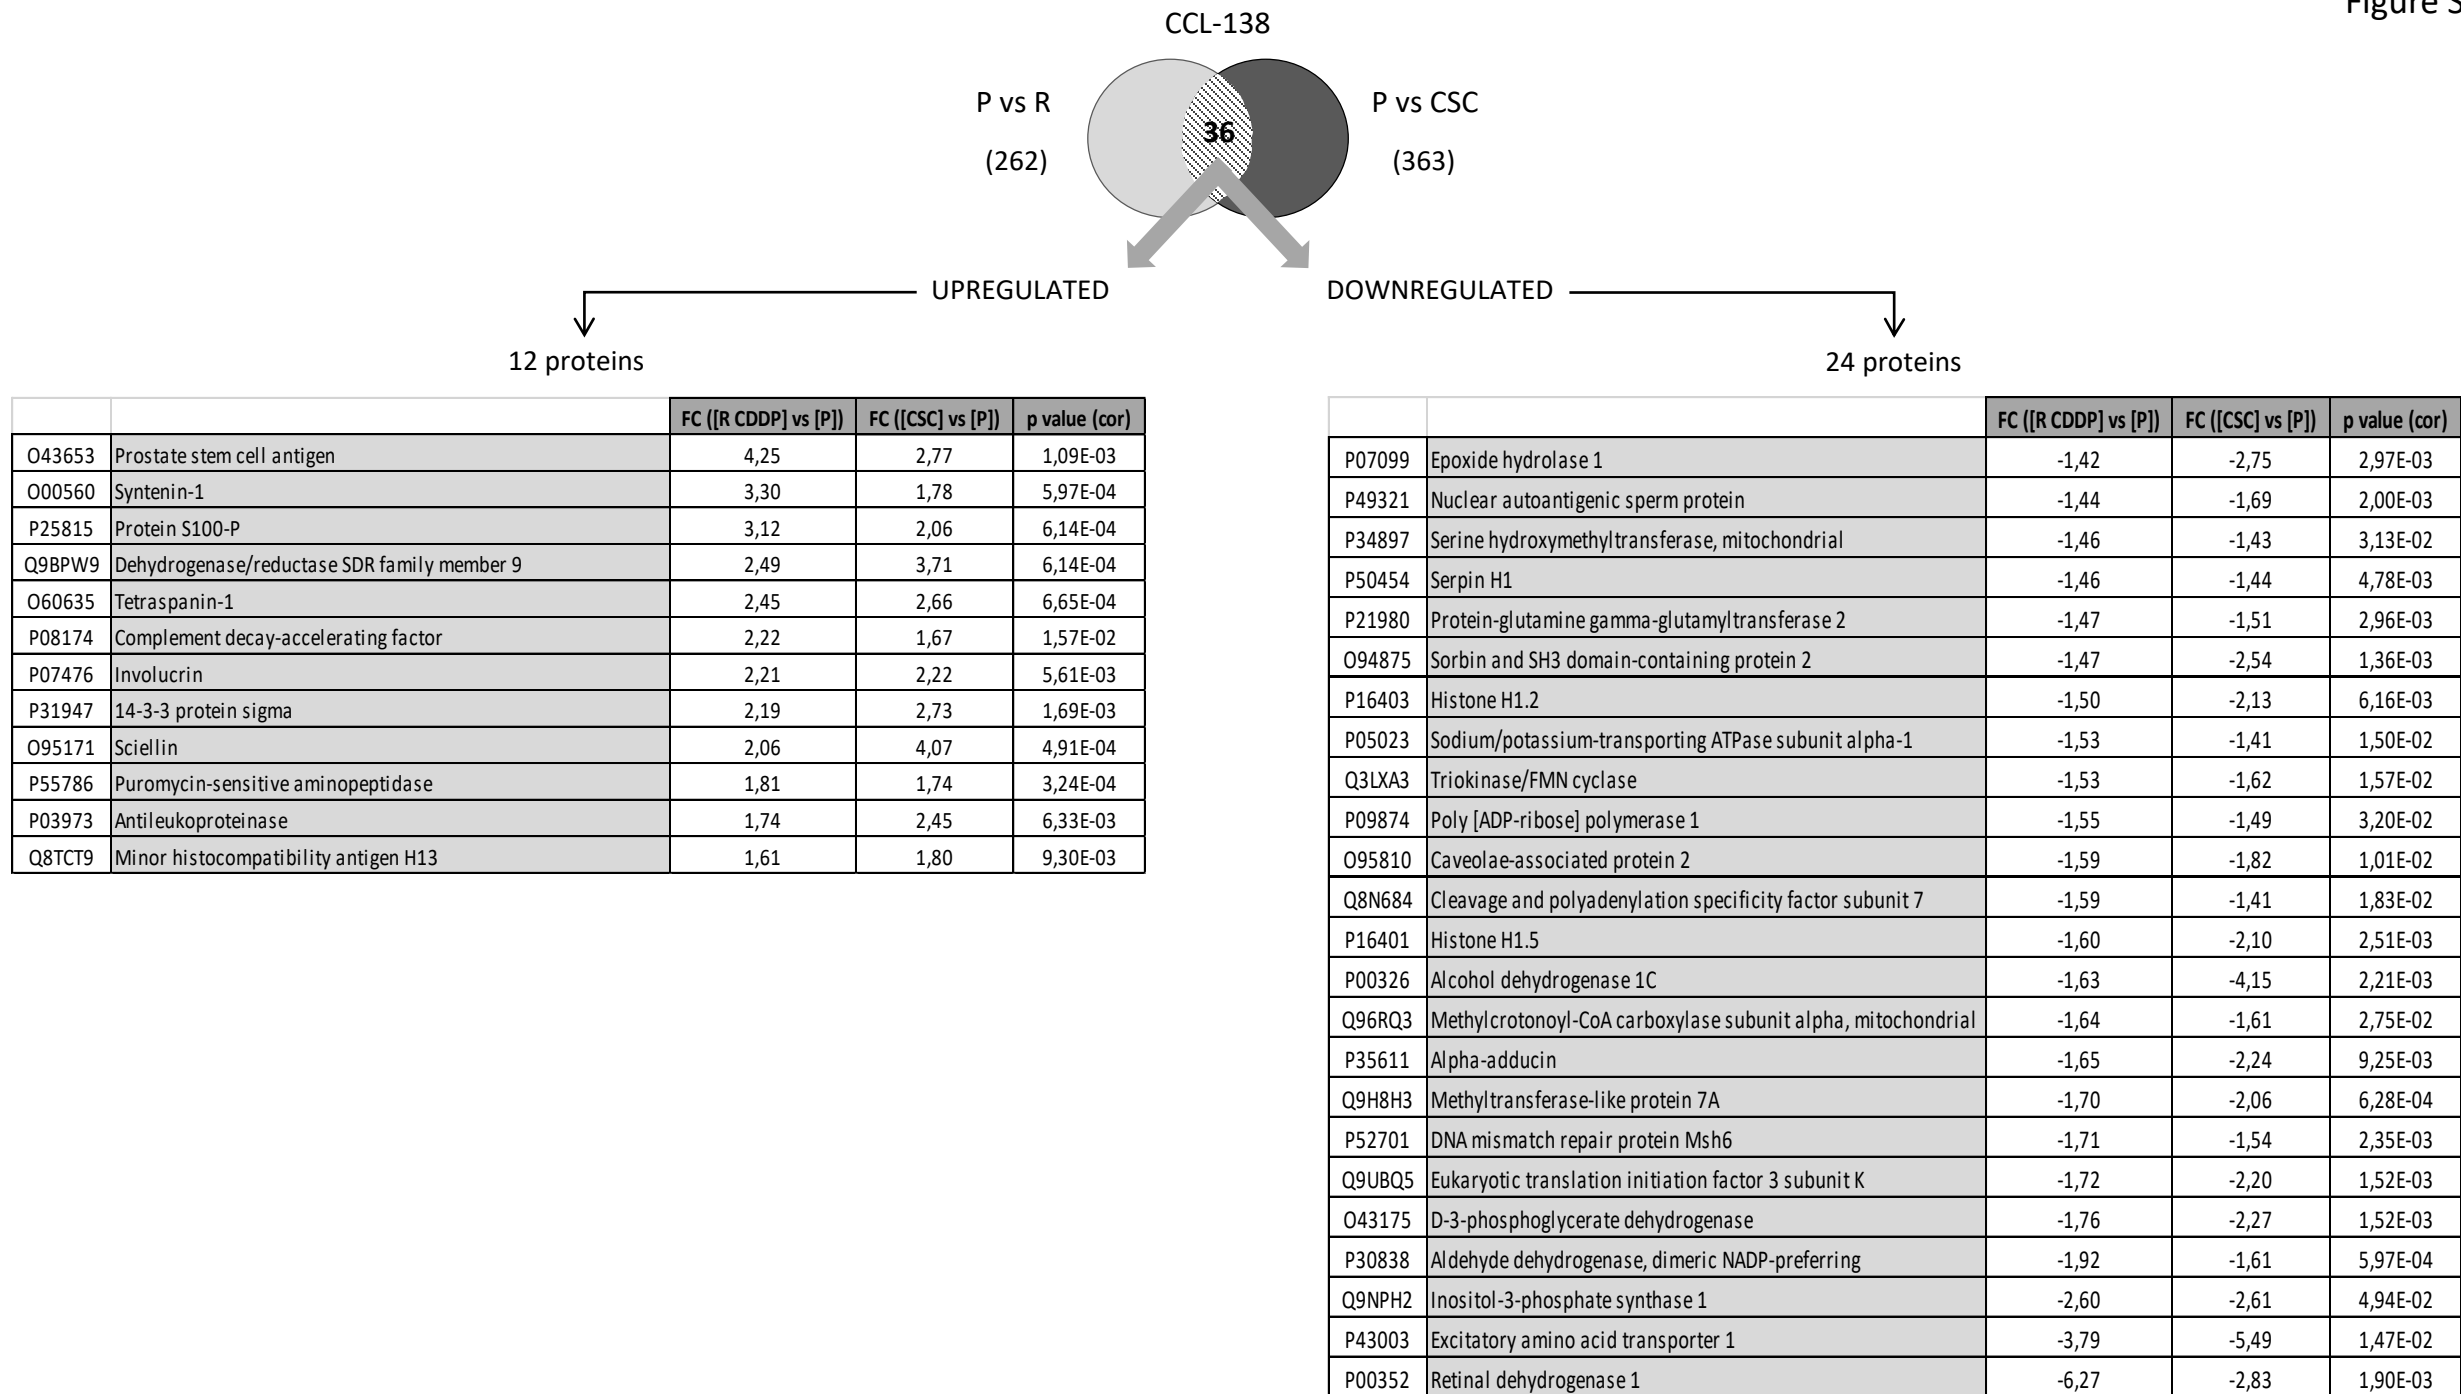

Supplement: s1 [file s1]

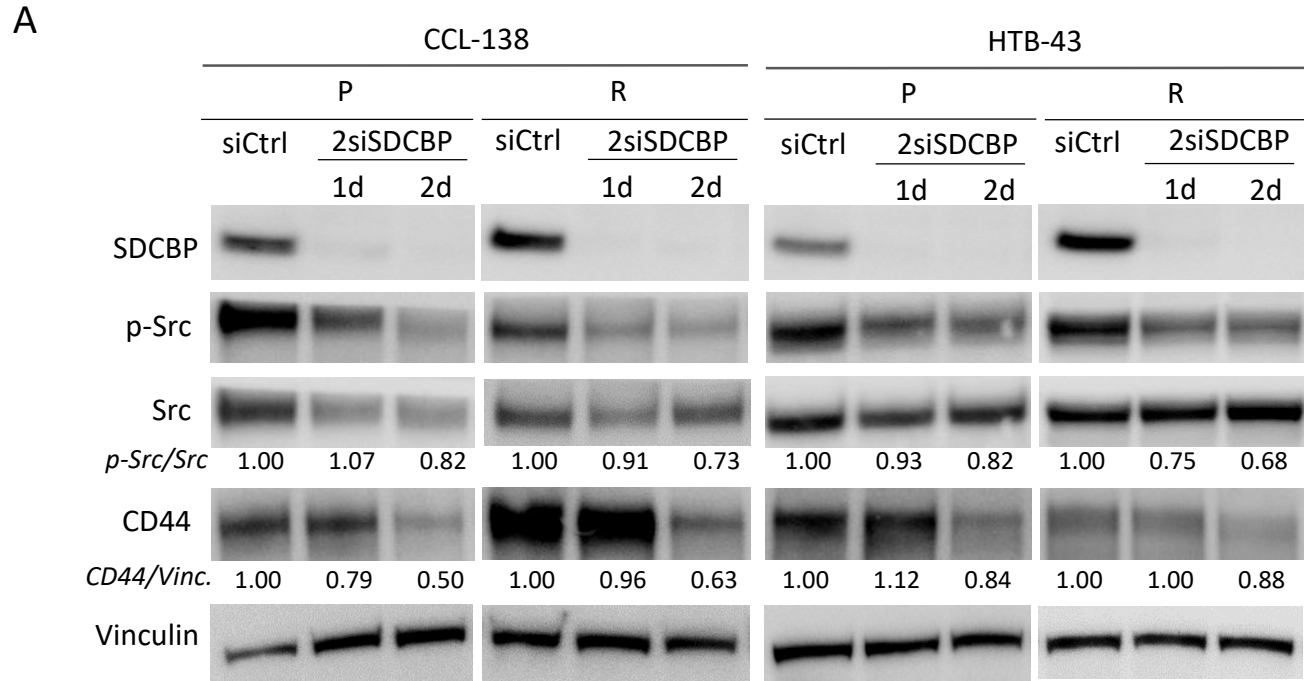

**C**

| Cell line | IC50 ( $\mu\text{M}$ ) |               |             |
|-----------|------------------------|---------------|-------------|
|           | 2siCtrl                | 2siSDCBP      | % Reduction |
| HTB-43-R  | $6.4 \pm 0.4$          | $5.1 \pm 0.1$ | 20.3        |

**B**

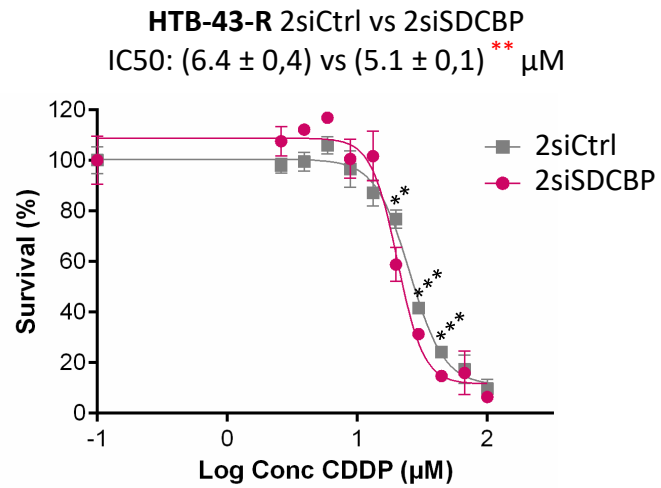

**D**

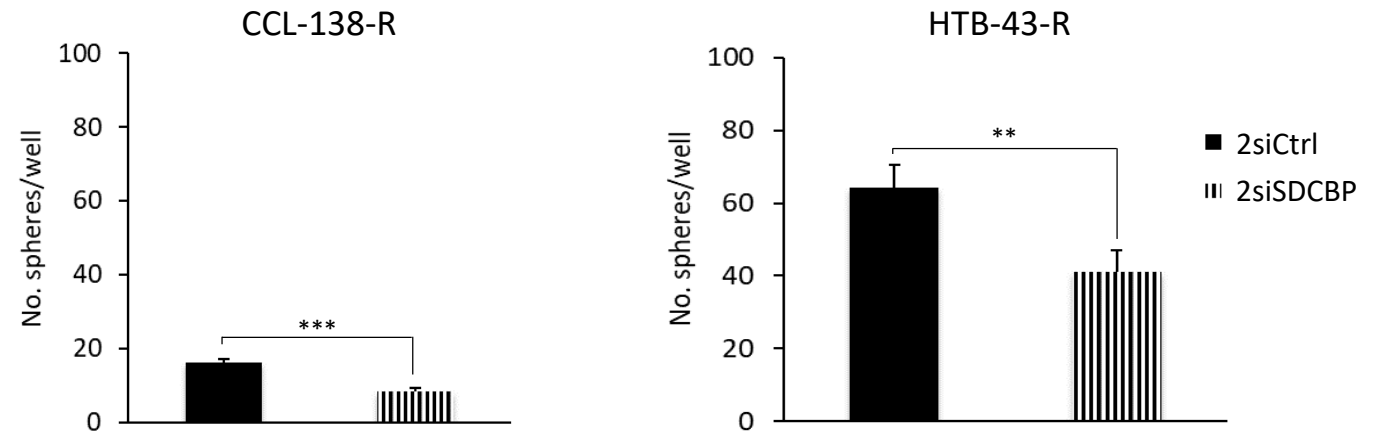

Supplement: s1 [file s1]
